# Supplementary material for: A combination of plasma membrane sterol biosynthesis and autophagy is required for shade-induced hypocotyl elongation
Source: PubMed Central journal article supplement (PMC9550796; doi:10.1038/s41467-022-33384-9), 2022-10-10
Supplement: 41467_2022_33384_MOESM1_ESM.pdf [file 41467_2022_33384_MOESM1_ESM.pdf]

## Supplementary Information

### **A combination of plasma membrane sterol biosynthesis and autophagy is required for shade-induced hypocotyl elongation.**

Yetkin Çaka Ince <sup>1</sup>, Johanna Krahmer <sup>1</sup>, Anne Sophie Fiorucci <sup>1</sup>, Martine Trevisan <sup>1</sup>, Vinicius Costa Galvão <sup>1</sup>, Leonore Wigger <sup>2</sup>, Sylvain Pradervand <sup>2</sup>, Laeticia Fouillen <sup>3</sup>, Pierre Van Delft <sup>3</sup>, Manon Genva <sup>3</sup>, Sebastien Mongrand <sup>3</sup>, Hector Gallart-Ayala <sup>4</sup>, Julijana Ivanisevic <sup>4</sup> and Christian Fankhauser <sup>1\*</sup>

Supplementary figures 1 to 9

Supplementary table 1 and 2

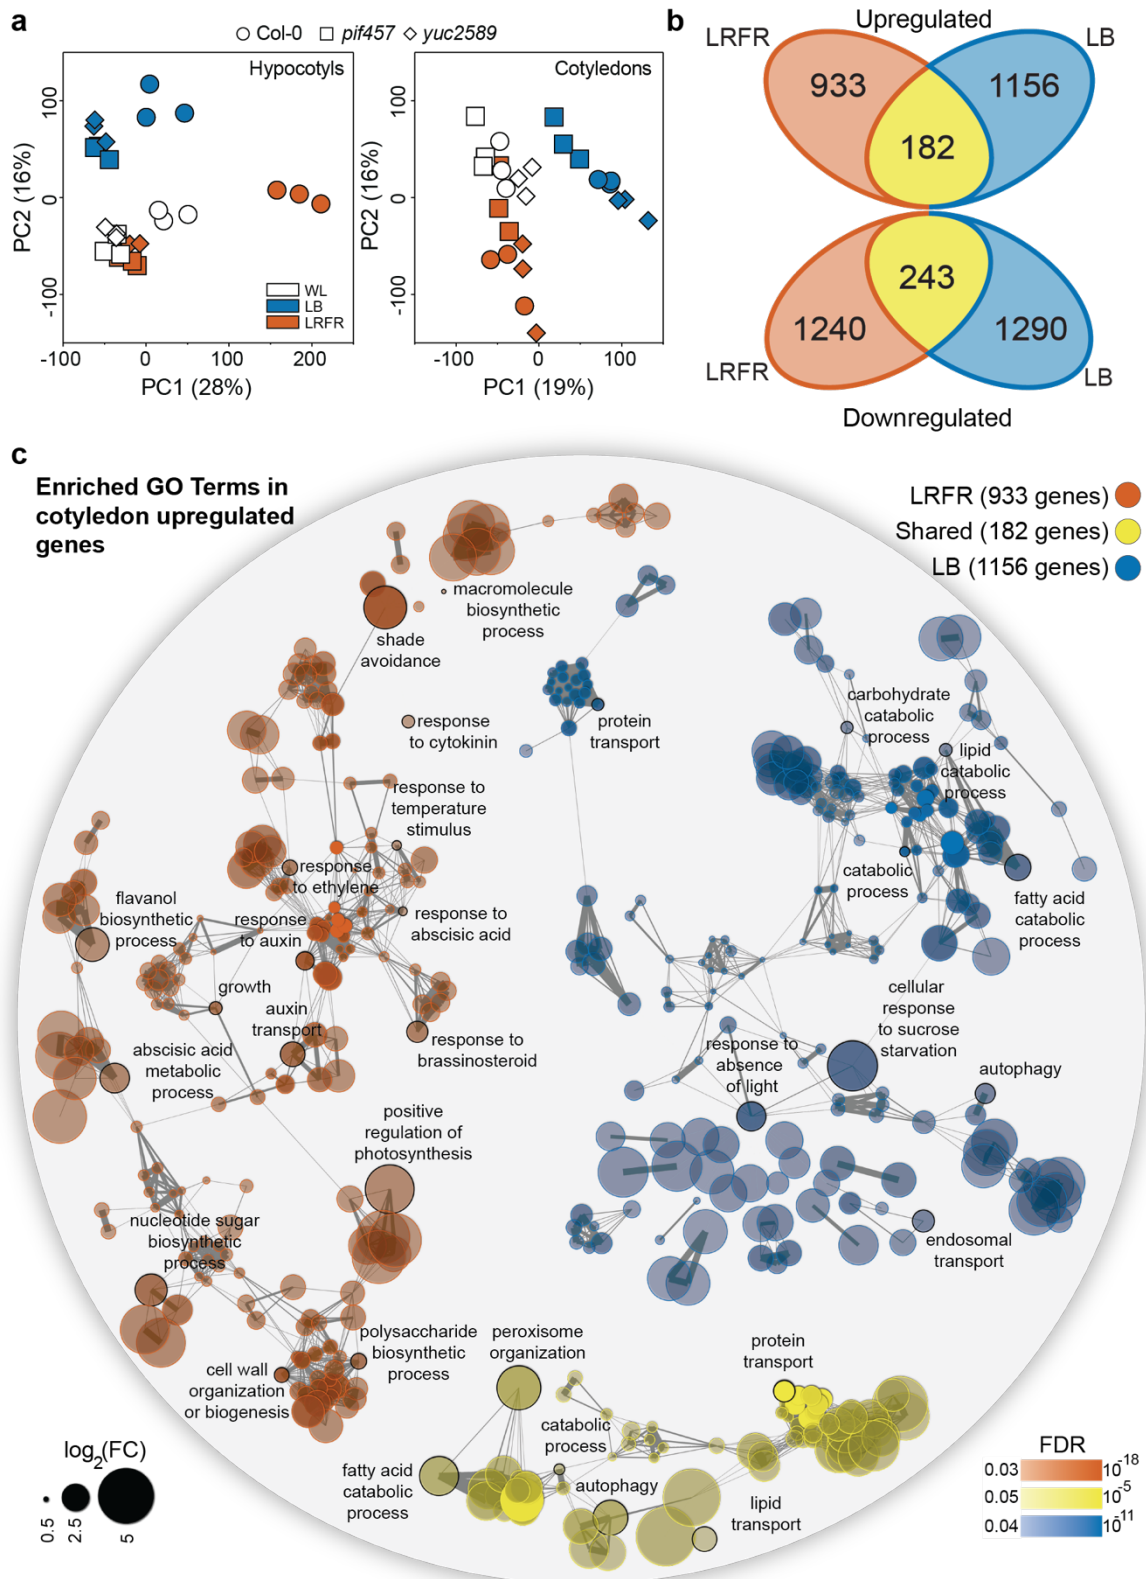

**Supplementary Figure 1. LB and LRFR induce distinct transcriptional changes in cotyledons.** (a) Principal component (PC) analysis of hypocotyl and cotyledon transcriptomes. PC1 and PC2 of each biological replicate ( $n = 3$ ) are graphically visualized. (b) Number of up- and downregulated genes in Col-0 cotyledons in the indicated light

conditions (FDR<0.05, T-test with BH correction). (c) GO term enrichment analysis in the cotyledon upregulated gene lists. Each node indicates a significantly enriched GO term (FDR<0.05). Two terms (nodes) are connected if they share 20% or more genes. The line thickness increases with the increased number of shared gene sets between two terms. Only selected GO terms (black circles) are annotated. The full list of enriched GO terms is in Supplementary data 2, the interactive version of (c) is available <https://figshare.com/s/268fb1b265883e46f671> See also Figure 1.

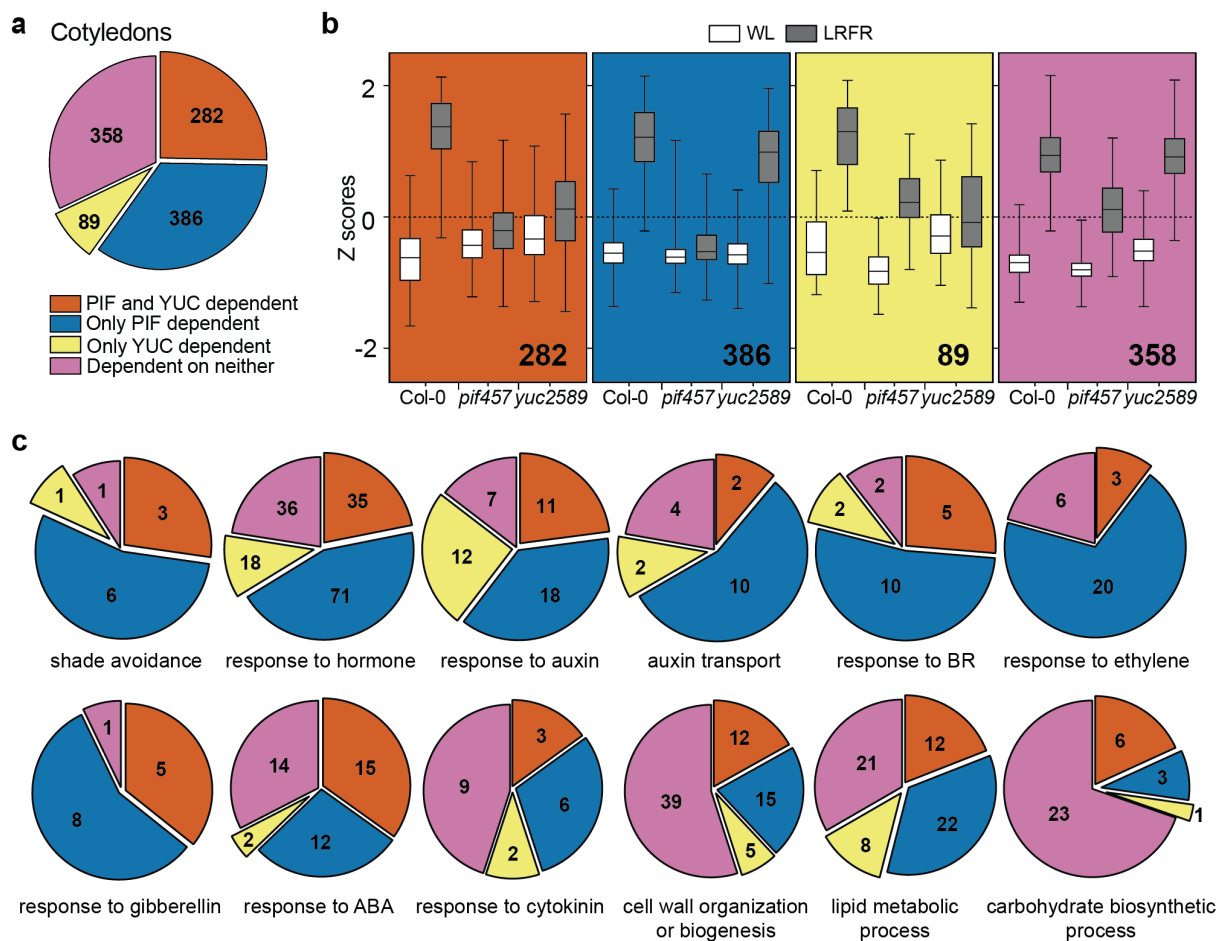

**Supplementary Figure 2. PIFs & YUCs are required for hormone-associated transcriptional changes in LRFR in cotyledons.**

(a) The distribution of cotyledon-induced genes in LRFR according to the dependence on PIFs and YUCs using the comparison of Col-0, *pif457* and *yuc2589* transcriptomes (FDR<0.05, F-test with post-hoc test). (b) Distributions of Z- scores computed from replicates averages for categories shown in (a). The horizontal bar represents the median; boxes extend from the 25th to the 75th percentile, whiskers extend to show the data range. (c) The distribution of cotyledon-induced genes according to the dependence on PIFs and YUCs in each of the selected significantly enriched GO terms. Numbers indicate significantly regulated genes in the given categories and/or GO terms. The full list of misregulated genes and enriched GO terms are given in Supplementary Data 3. See also Figure 2.

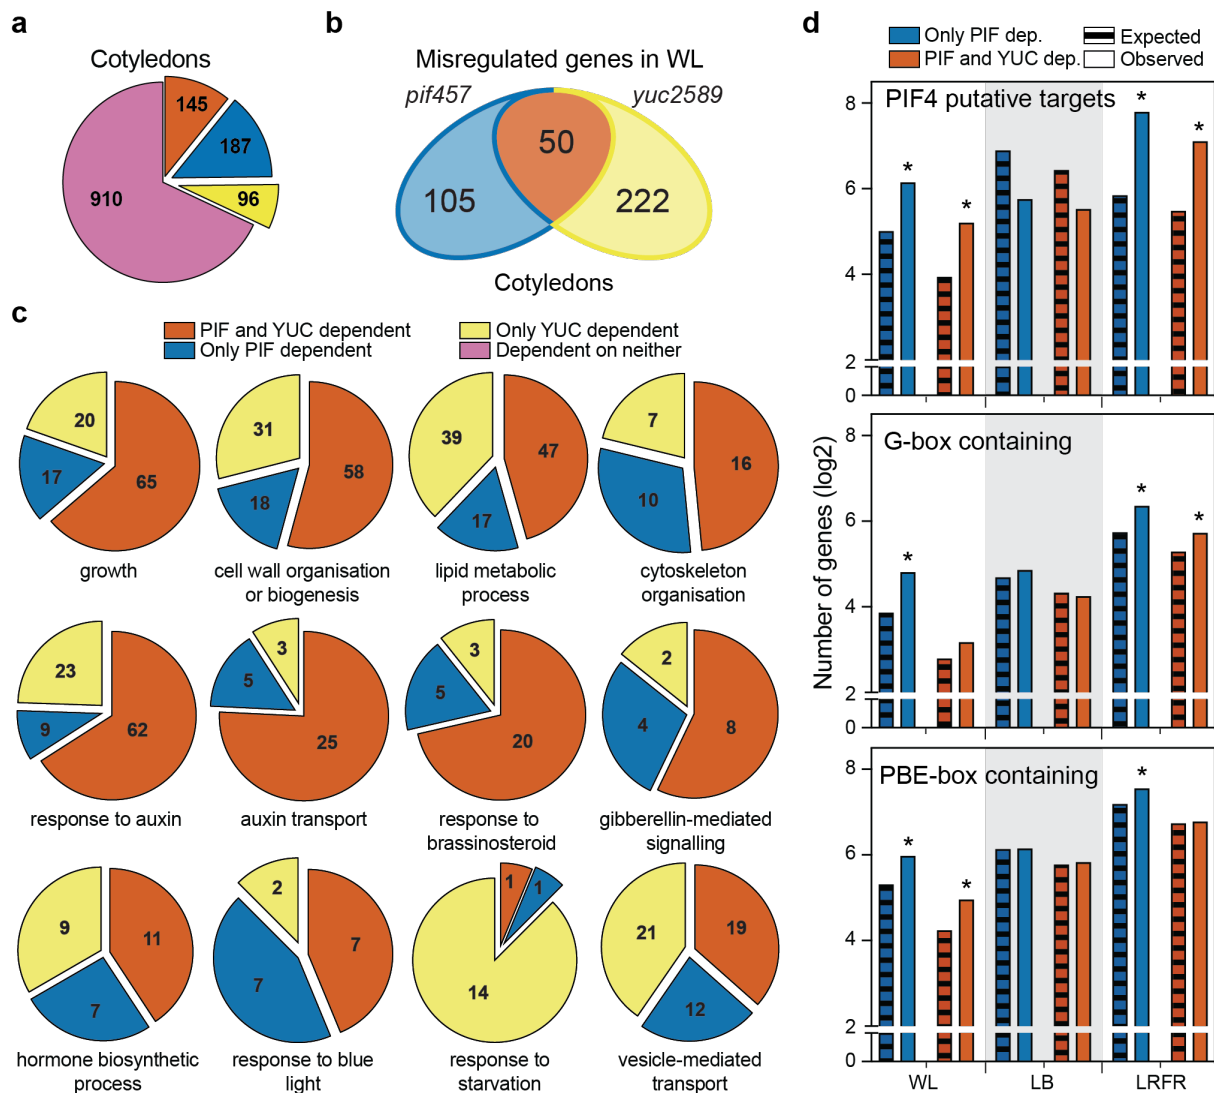

**Supplementary Figure 3. PIFs & YUCs are required for basal expression of many growth- and hormone- associated genes in WL in cotyledons.**

(a) The distribution of LB-induced genes in cotyledons according to the dependence on PIFs and YUCs using the comparison of Col-0, *pif457* and *yuc2589* transcriptomes (FDR<0.05, F-test with post-hoc test). (b) Number of misregulated genes in *pif457* and *yuc2589* hypocotyls compared to Col-0 in WL (FDR<0.05, T-test with BH correction). (c) The distribution of misregulated genes in *pif457* and *yuc2589* hypocotyls (as grouped in Fig. 3C) in each of the selected significantly enriched GO terms. The full list of enriched GO terms is given in Supplementary Data 5. (d) Comparison of PIF dependent genes in cotyledons with putative PIF4 targets (as listed in 26), promoters (1 kb upstream) containing G-box (CACGTG) or PBE-box (CATGTG). Asterisks (\*) indicate statistically significant overrepresentation compared to expected ( $P < 0.05$ , Binomial distribution, one tailed; the exact P values are available in the Source Data). Numbers indicate significantly

regulated genes in the given categories and/or GO terms. The full list of misregulated genes, enriched GO terms, and enriched motifs are given in Supplementary Data 4, 5, and 6. See also Figure 3.

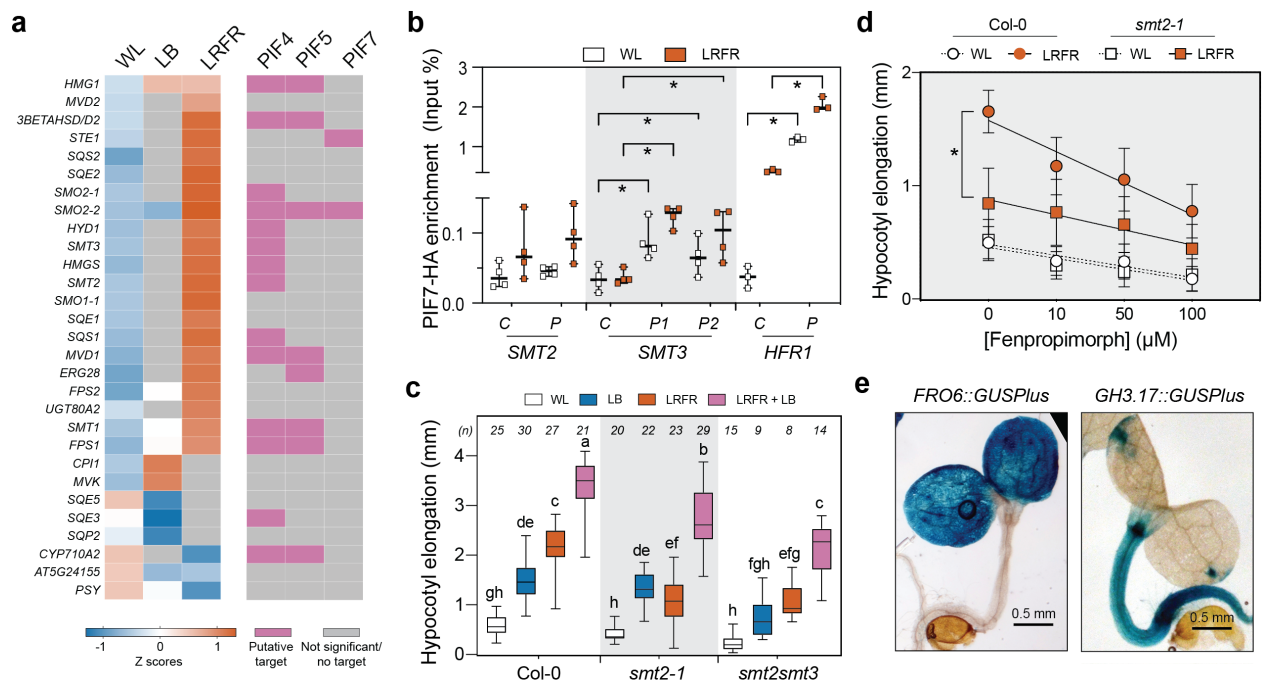

**Supplementary Figure 4. SMT2 is locally required for LRFR-induced hypocotyl elongation.**

(a) The heatmap showing average Z-scores of genes annotated in sterol biosynthesis (GO: 0016126) in RNA-seq and putative binding of PIF4, PIF5 and PIF7 (ChIP-seq data from [26:45](#)). A gene is shown if it is significantly regulated at least in one treatment (LB or LRFR). (b) PIF7-HA binding to the promoter of the indicated genes. PIF7-HA enrichment is quantified by qPCR and presented as IP/Input. Each data point indicates technically independent samples, horizontal bar represents the median, whiskers extend to show the data range. Control – C, Peak – P. (c, d) Hypocotyl elongation of indicated genotypes in the indicated conditions. (c) The horizontal bar represents the median; boxes extend from the 25th to the 75th percentile, whiskers extend to show the data range. (b, d) Data are means  $\pm$  SD with a regression line. Different letters (C, two-way ANOVA with Tukey's HSD test) and asterisks (\*) (b, Student's T-test, one-tailed) (d, two-way ANOVA) indicate significant difference ( $P < 0.05$ ) compared to control (b), and between genotypes in given light condition (d). The exact P values are available in the Source Data. Sample size (n) that is given on top (c); ((d) For Col-0: n (WL) = 17, 16, 19, 19; n (LRFR) = 21, 21, 15, 20. For *smt2-1*: n (WL)= 15, 21, 18, 14; n (LRFR) = 16, 20, 15, 19 with an order of Mock, 5  $\mu$ M, 50  $\mu$ M, 100  $\mu$ M respectively) indicates biologically independent seedlings examined over one experiment. The experiments were repeated three (c) and two (d) times with similar results. (e) GUS staining of the indicated *promoter::GUSPlus* lines. See also Figure 4.

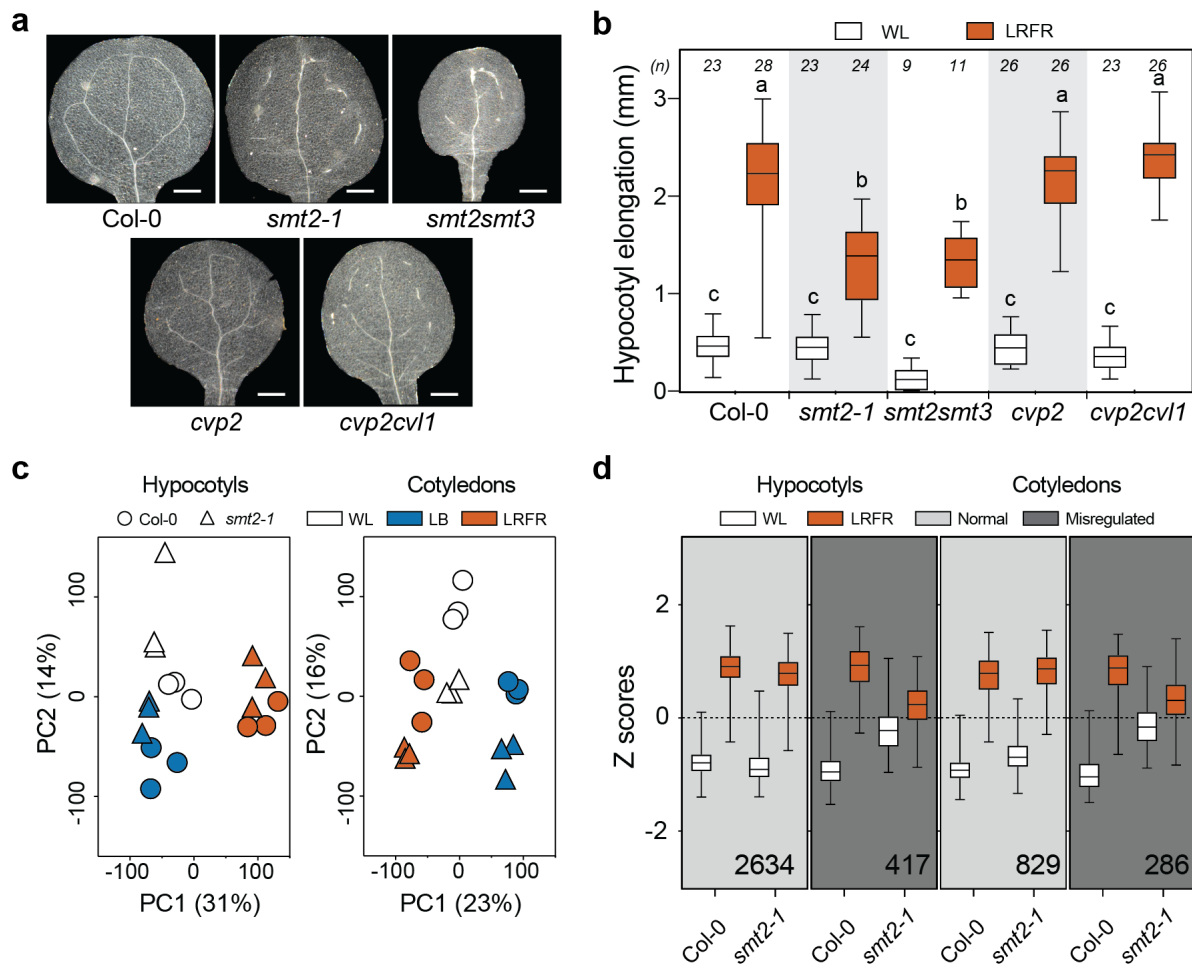

**Supplementary Figure 5. Phenotyping evaluation of cotyledon vasculature pattern (*cvp*) mutants and *smt2-1* transcriptome summary.**

(a) Representative images of cotyledon vasculature phenotype of indicated genotypes. White bars equal to 200  $\mu$ m. (b) Hypocotyl elongation of indicated genotypes. Different letters indicate significant difference ( $P < 0.05$ , two-way ANOVA with Tukey's HSD test; the exact P values are available in the Source Data). Sample size (n) that is given on top indicates biologically independent seedlings examined over one experiment. The experiment was repeated three times with similar results. (c) PCA of Col-0 and *smt2-1* transcriptomes. PC1 and PC2 of each biological replicate (n = 3) are graphically visualized. (d) Distributions of Z-scores computed from replicates averages for LRFR-induced genes that are grouped comparing Col-0 and *smt2-1* transcriptomes (FDR<0.05). 'Normal' and 'Misregulated' refer to expression in *smt2-1*. The numbers indicate significantly regulated genes in each group (FDR<0.05, F-test with post-hoc test). (b, d) The horizontal bar represents the median; boxes extend from the 25th to the 75th percentile, whiskers extend to show the data range. The full list of misregulated genes is given in Supplementary Data 7. See also Figure 5.



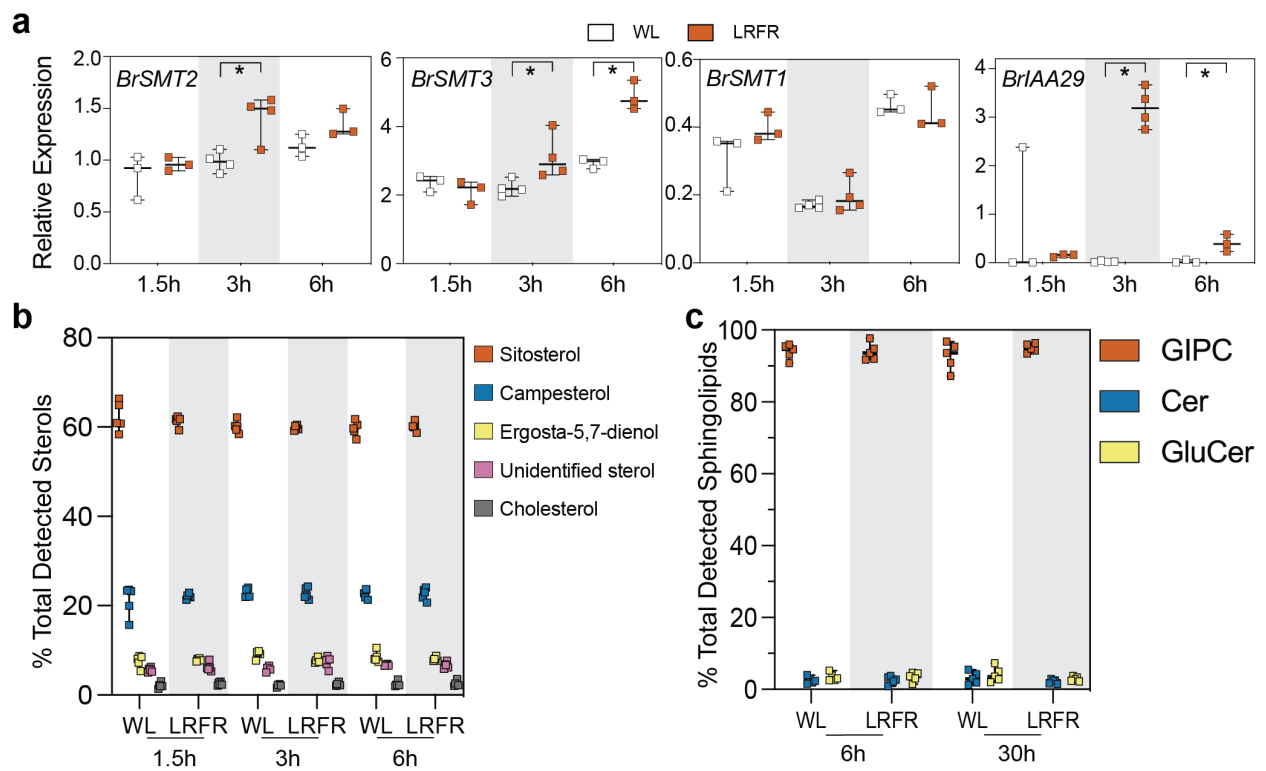

**Supplementary Figure 6. Sterol and Spingolipid composition of *B. rapa* hypocotyls does not change in LRFR**

(a) Relative expression of the indicated genes in 5-d-old *B. rapa* hypocotyls. Gene expression values were calculated as fold induction relative to *BrPP2A*. n = 4 (biological) with three technical replicates for each RNA sample. Asterisks (\*) indicate P < 0.05 (Student's T-test, one-tailed, the exact P values are available in the Source Data). Sterol (b) and Spingolipid (c) composition of 5-d-old *B. rapa* hypocotyls. GIPC, Glycosyl Inositol Phospho Ceramides; Cer, Cermides; GluCer, Glucosylceramide. (a, b, c) Each data point indicates biologically independent samples, horizontal bar represents the median, whiskers extend to show the data range.. See also Figure 6.

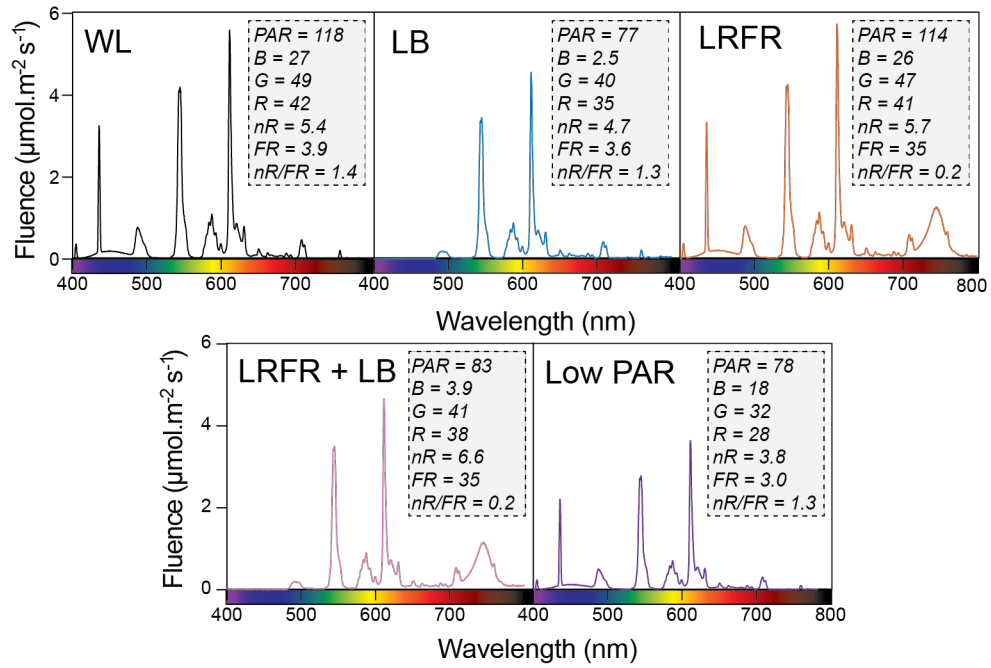

**Supplementary Figure 7. Light conditions used in this study.**

Photosynthetically active radiation (PAR, 400-700 nm), Blue (B, 400-500 nm), Green (G, 500-600 nm), Red (600-700 nm), Narrow R (nR, 640-700) and far-red (FR, 700-760 nm).

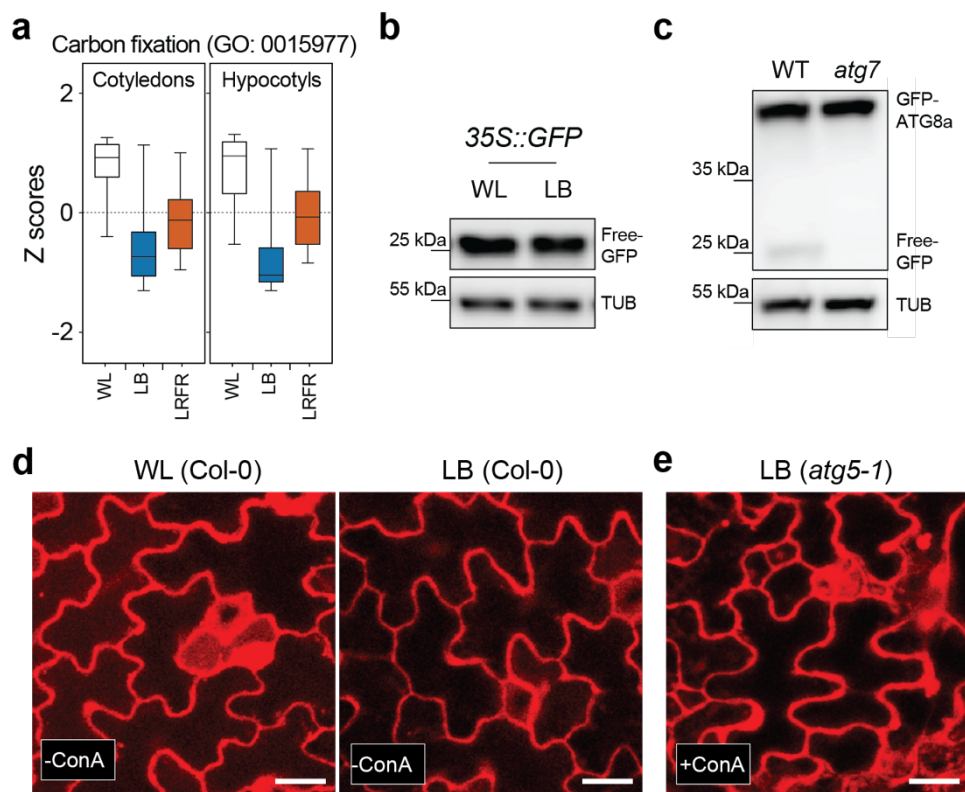

**Supplementary Figure 8. Induction of autophagy depends on LB and the autophagy pathway.**

(a) Distributions of Z- scores computed from replicates averages for genes listed in carbon fixation GO term in Col-0 seedlings. The horizontal bar represents the median; boxes extend from the 25th to the 75th percentile, whiskers extend to show the data range. The full list of genes in Carbon fixation GO term is given in Supplementary Data 10. (b) Western blot assay using a *35S::GFP* line grown in WL with and without 8h LB. (c) Western blot assay of GFP-ATG8a and Free-GFP levels in WT and *atg7-2* seedlings treated with 8h of LB in the presence of 0.5  $\mu$ M ConA. In (b) and (c) TUB was used as a loading control. The experiments were repeated four times with similar results. (d, e) Representative image of cotyledon pavement cells of *UBQ10::mCherry-ATG8e* (d) in Col-0 kept in WL or treated with LB in the absence of ConA for 8h and (e) in *atg5-1* treated with LB in the presence of ConA for 8h. The experiment was repeated two times with similar results using 5 to 7 biologically individual seedlings for each condition and the experiment. White bars equal 20  $\mu$ m. See also Figure 7.

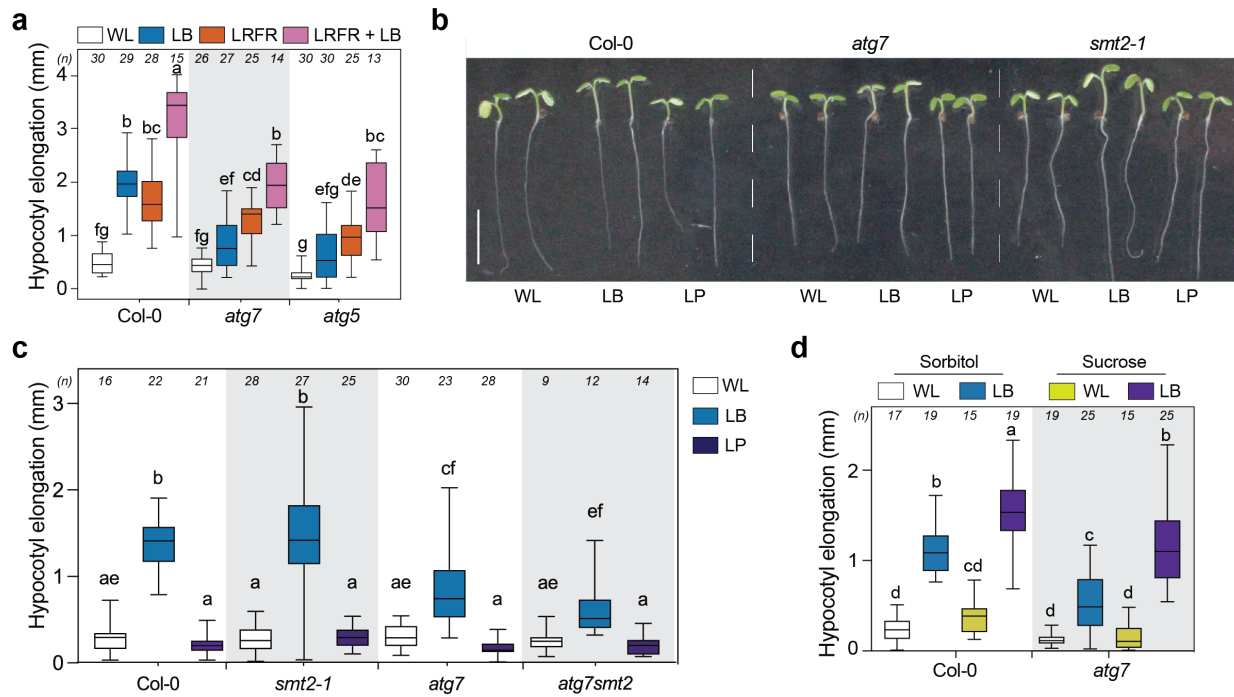

### Supplementary Figure 9. Regulation of hypocotyl elongation in autophagy mutants.

(a) Hypocotyl elongation of the *atg* mutants in LB, LRFR and LRFR+LB. (b) Representative pictures of the indicated genotypes in the indicated light conditions. White bar equals to 5 mm. (c) Hypocotyl elongation of *smt2*, *atg7* and *smt2atg7* in WL, LB and LP. Col-0 data is the same as the one shown in Figure 8c (left panel). (d) Hypocotyl elongation of the indicated genotypes in WL and LB with or without external sucrose. (a, c, d) The horizontal bar represents the median; boxes extend from the 25th to the 75th percentile, whiskers extend to show the data range. Different letters indicate significant difference ( $P < 0.05$ , two-way ANOVA with Tukey's HSD test; the exact P values are available in the Source Data). The experiments were repeated three (a) and two (c, d) times with similar results. See also Figure 8.

**Supplementary Table 1:** List of oligonucleotides used in the study

**Included She Description**

|            |                                             |
|------------|---------------------------------------------|
| Genotyping | List of oligonucleotides used in genotyping |
| Cloning    | List of oligonucleotides used in cloning    |
| ChIP-qPCR  | List of oligonucleotides used in ChIP-qPCR  |
| RT-qPCR    | List of oligonucleotides used in RT-qPCR    |

| Allele                 | Collection   | Name    | Sequence                                  |
|------------------------|--------------|---------|-------------------------------------------|
| <i>smt2-1 (frl1)</i>   | EMS*         | YI428   | TCACCATCAATCCCCGGAAA                      |
|                        |              | YI429   | CTGCGTACTTCTTCCAGC                        |
|                        |              |         | *PCR is followed by digestion with BsaHI  |
|                        |              | YI426   | CTCTCTTGGTCTTCTCACTTTCACGAAAAT            |
|                        |              | YI427   | AACCAGTAGATACCGACGGCGAC                   |
| <i>smt2-2 (cvp1-3)</i> | EMS**        |         | **PCR is followed by digestion with MslI  |
|                        |              | YI430   | CATGATTTTATTTTGTGAAGAAAAATG               |
| <i>smt3-1</i>          | SALK_085292  | YI431   | CCAGCTTTCTTGTGTGAAGC                      |
|                        |              | OM181   | CGG TGT ATC CAC GGG AGT AA                |
|                        |              | OM182   | CGC TTG TTG AGA TGC AGA AT                |
| <i>cvp2-1</i>          | EMS***       |         | ***PCR is followed by digestion with BslI |
| <i>cvl1-1</i>          | SALK_029945  | OM183   | TGA TCA GAA AAC CGT GAC TCC               |
|                        |              | OM184   | AGC ACA TTT TTG AAT TCA CCG               |
| <i>yuc5-1</i>          | SAIL_116_CO1 | MT458   | GAATCCAGCCGCGTAAAGTC                      |
|                        |              | AG178   | GACGAGACAAGTGGTCTCTGG                     |
| <i>atg7-2</i>          | GABI_655B06  | YI444   | GGAGCTTAACAAAGGGAAACG                     |
|                        |              | YI445   | CGTGTAACAGTGCATTGTTGG                     |
| <i>yuc2-1</i>          | SALK_030199  | oJM1845 | TTCTTGCATTTTCTCGCTCTACG                   |
|                        |              | MT440   | AACCCGTGGCGAGTATAATG                      |
| <i>yuc8-1</i>          | CS110939     | oJM1206 | CATCCTCTCCACGTGGCTTCC                     |
|                        |              | oJM1207 | GAACTGACGCTTCGTCGGGTAC                    |
| <i>yuc9-1</i>          | SAIL_871G01  | oJM1199 | GCTCGGTAAGCAAAACAAAAGT                    |
|                        |              | oJM1200 | GAAGGAAATGCCCAATGAGAC                     |
| <i>pif4-101</i>        | SAIL_114_G06 | SL-43   | CAGACGGTTGATCATCTG                        |
|                        |              | oVCG-61 | TAGCATCTGAATTTATAACCAATCTCGATACAC         |
| <i>pif5-3 (pil6-1)</i> | SALK_087012  | SL-46   | TCGCTCACTCGCTTACTTAC                      |
|                        |              | oVCG-56 | ATTTTGCCGATTTCCGGAAC                      |
|                        |              | SL-195  | GTGGCAAGTTGGCTTTAGG                       |
| <i>pif7-1</i>          | CS68809      | SL-169  | TGATAGTGACCTTAGGCGACTTTTGAACGC            |

*pif7-2*

|              |         |                                   |
|--------------|---------|-----------------------------------|
| SAIL_622_G02 | oASF-27 | GGAGAGCCATAGAGTTGG                |
|              | oVCG-61 | TAGCATCTGAATTCATAACCAATCTCGATACAC |

| Plasmid                                 | Target        | Name  | Sequence                                                       |
|-----------------------------------------|---------------|-------|----------------------------------------------------------------|
| <b>pYI001</b>                           |               |       |                                                                |
| <b>(GUSPlus::tOCS in pFP100)*</b>       |               | YI001 | TCAAGCTAAGCTTGCATGCCCGGGAAAATGGTAGATCTGAGGGTAA                 |
|                                         | GUSPlus::tOCS | YI002 | CCTAAAACCAAAATCCAGTGGCGCTCTAGAGGTCCTGCTGA                      |
| <b>pYI006 (pFRO6::GUSPlus::tOCS)**</b>  |               | YI011 | ATCCAAGCTCAAGCTAAGCTc gatgctctcaaggccaa                        |
|                                         | pFRO6         | YI012 | TAGAAATTTACCCTCAGATCTACCATctttatttgaatttccacttctc              |
| <b>pYI012 (pGH3.17::GUSPlus::tOCS)*</b> |               | YI020 | ATCCAAGCTCAAGCTAAGCTCATAAACATTTACCTTTCATGG                     |
|                                         | pGH3.17       | YI024 | TAGAAATTTACCCTCAGATCTACCATtTtctgaaagcagacacaaacaaagc           |
| <b>pYI046</b>                           |               |       |                                                                |
| <b>(pUBQ10::SMT2-FLAG::tOCS)*</b>       |               | YI052 | ATCCAAGCTCAAGCTAAGCTTCGACGAGTCAGTAATAAACGGC                    |
|                                         | pUBQ10        | YI070 | AAGAGTCCATTTTCCGCGGGctagtCTGTT                                 |
|                                         |               | YI071 | CCCGCGGAAAATGGACTCTTTAACACTCTTCTT                              |
|                                         | SMT2-FLAG     | YI072 | TATCTCATTAAAGCAGGATCCTCACTTGTGCATCGTCCTTGTAATCAGAACTCTCCTCCGGT |
|                                         |               | YI056 | GTGAAGGATCCTGCTTTAATGAGA                                       |
|                                         | tOCS          | YI002 | CCTAAAACCAAAATCCAGTGGCGCTCTAGAGGTCCTGCTGA                      |
| <b>pYI047</b>                           |               |       |                                                                |
| <b>(pFRO6::SMT2-FLAG::tOCS)**</b>       |               | YI011 | ATCCAAGCTCAAGCTAAGCTc gatgctctcaaggccaa                        |
|                                         | pFRO6         | YI073 | AAGAGTCCATctttatttgaatttccacttctcagtgttg                       |
|                                         |               | YI074 | tcaaataaagATGGACTCTTTAACACTCTTCTTCACC                          |
|                                         | SMT2-FLAG     | YI072 | TATCTCATTAAAGCAGGATCCTCACTTGTGCATCGTCCTTGTAATCAGAACTCTCCTCCGGT |
| <b>pYI048</b>                           |               |       |                                                                |
| <b>(pGH3.17::SMT2-FLAG::tOCS)**</b>     |               | YI020 | ATCCAAGCTCAAGCTAAGCTCATAAACATTTACCTTTCATGG                     |
|                                         | pGH3.17       | YI075 | AAGAGTCCATtTtctgaaagcagacacaaacaaag                            |
|                                         |               | YI076 | ctttcagaAaATGGACTCTTTAACACTCTTCTTCACCG                         |
|                                         | SMT2-FLAG     | YI072 | TATCTCATTAAAGCAGGATCCTCACTTGTGCATCGTCCTTGTAATCAGAACTCTCCTCCGGT |

**Strategy \*** Digestion of pFP100 with KpnI and HindIII was followed by in fusion

**Strategy \*\*** Digestion pYI001 with HindIII and BglII was followed by in fusion cloning



| <b>Target</b>       | <b>Name</b> | <b>Sequence</b>         |
|---------------------|-------------|-------------------------|
| <i>SMT2 (peak)</i>  | YI633       | AGGTCCCTAGAGTGAGGGTG    |
|                     | YI634       | CTCCACCACCACACGTGATT    |
| <i>SMT2 (Contro</i> | YI522       | TACGAGTGGGTTACGACGGA    |
|                     | YI523       | CGCCTCTCTCAATCCCTTGG    |
| <i>SMT3 (Peak 1</i> | YI653       | GGTCCTTGGGGTATCCAATTAT  |
|                     | YI654       | GAGTCATGCATGTGATACGACC  |
| <i>SMT3 (Peak 2</i> | YI659       | TTTTCCCTGCCTGACCCTTG    |
|                     | YI660       | GCAAAAATGAAGACGGATCATGG |
| <i>SMT3 (Contro</i> | YI528       | TACCAAGTGCAACGAGCCAA    |
|                     | YI529       | ACGTGTTTTTCATCGAACGGC   |
| <i>HFR1 (Peak)</i>  | PH112       | ACGTGATGCCCTCGTGATGGAC  |
|                     | PH113       | GTCGCTCGCTAAGACACCAAC   |
| <i>HFR1 (Contro</i> | PH126       | ACGCAACAAACGAACCACAC    |
|                     | PH127       | AGAGCGATCGGATCAGATAG    |

| <b>Target</b>  | <b>Name</b> | <b>Sequence</b>       |
|----------------|-------------|-----------------------|
| <i>BrSMT2</i>  | YI636       | GCCGAGATCTACAGGGTGTT  |
|                | YI637       | TTGGATGACCTCCACGTGTT  |
| <i>BrSMT3</i>  | YI640       | GATGGGTTCGGATTGCGTACT |
|                | YI641       | TCCCAACAGCAGACAGAACC  |
| <i>BrSMT1</i>  | YI650       | GCCAGTCAGACAAGGAAGAT  |
|                | YI651       | CCTCGTCGTACACAACAGAA  |
| <i>BrIAA29</i> | YI668       | TGCATTTGACCCTGACAACG  |
|                | YI669       | TGGCCAGATCCTTTTCCCAT  |
| <i>BrPP2A</i>  | YI656       | AACGCCCCCGATACGAATTA  |
|                | YI657       | CCACGGTCTACATAGTCACCC |

**Supplemental Table 2.** List of the key resources used in the study

| <b>Reagent or Resource</b>                                                                                        | <b>Source</b>                           | <b>Identifier</b> |
|-------------------------------------------------------------------------------------------------------------------|-----------------------------------------|-------------------|
| <b>Biological Samples</b>                                                                                         |                                         |                   |
| DNA and RNA from various plant tissues from <sup>[L]</sup> <sub>[SEP]</sub> <i>Arabidopsis</i> and <i>B. rapa</i> | See methods                             | N/A               |
| Hypocotyl samples from <i>B. rapa</i> for lipidomics, sterol, and sphingolipid measurements                       | See methods                             | N/A               |
| <b>Chemicals, peptides, recombinant proteins, and commercial assays</b>                                           |                                         |                   |
| Murashige and Skoog medium including vitamins                                                                     | Duchefa Biochemie, Haarlem, Netherlands | M0222.0010        |
| Phytoagar                                                                                                         | Agar-Agar, plant; Roth                  | Art.-Nr. 4807.3   |
| Sucrose                                                                                                           | AppliChem                               | A2211,1000        |
| Sorbitol                                                                                                          | AppliChem                               | A2222,0500        |
| Fenpropimorph                                                                                                     | Carbosynth, United Kingdom,             | FF23264           |
| Picloram                                                                                                          | Sigma-Aldrich, Steinheim, Germany,      | P5575             |
| Concanamycin A                                                                                                    | Sigma-Aldrich, Steinheim, Germany,      | C9705             |

|                                                                         |                                                   |                 |
|-------------------------------------------------------------------------|---------------------------------------------------|-----------------|
| Fast SYBR Green<br>Master Mix                                           | Applied Biosystems                                | Cat# 4385612    |
| Phusion® High-<br>Fidelity DNA<br>Polymerase                            | New England<br>Biolabs,<br>Massachusetts,<br>USA, | Cat. No. M0530  |
| In Fusion® HD<br>Cloning kit                                            | Takara, California,<br>USA                        | Cat. No. 639649 |
| RNAlater™-ICE                                                           | Thermo Fisher<br>Scientific, United<br>States     | AM7030          |
| NEBNext Ultra II<br>Directional RNA<br>Library Prep Kit for<br>Illumina | New England<br>Biolabs,<br>Massachusetts,<br>USA  | E7760L          |
| Illumina HiSeq<br>3000/4000 SR<br>Cluster Kit                           | Illumina; San<br>Diego, California,<br>USA        | TG-410-1005     |
| HiSeq 3000/4000<br>SBS Kit                                              | Illumina; San<br>Diego, California,<br>USA        | GD-410-1001     |
| KpnI                                                                    | New England<br>Biolabs,<br>Massachusetts,<br>USA, | R0142S          |
| HindIII-HF                                                              | New England<br>Biolabs,<br>Massachusetts,<br>USA, | R3104S          |
| BglII                                                                   | New England<br>Biolabs,<br>Massachusetts,<br>USA, | R0144S          |

|                                                     |                                                |                           |
|-----------------------------------------------------|------------------------------------------------|---------------------------|
| BsaHI                                               | New England Biolabs,<br>Massachusetts,<br>USA, | R0556S                    |
| MslII                                               | New England Biolabs,<br>Massachusetts,<br>USA, | R0571S                    |
| BslI                                                | New England Biolabs,<br>Massachusetts,<br>USA, | R0555S                    |
| Trans-Blot® Turbo™ RTA Transfer Kit, Nitrocellulose | Bio-Rad, Hercules,<br>CA, USA                  | Cat. No. 170-4270         |
| 10% Mini-Protean TGX gels                           | Bio-Rad, Hercules,<br>CA, USA                  | Cat. No. 4561036          |
| Anti-GFP JL-8                                       | Clontech,<br>California, USA                   | Cat. No.<br>632380/632381 |
| Polyclonal H3                                       | Abcam, Cambridge,<br>UK                        | Cat. No.1791              |
| Anti-TUB                                            | Abicode, California,<br>USA                    | Cat. No. M0267-1a         |
| Horseradish peroxidase (HRP)-conjugated anti-mouse  | Promega, Madison,<br>USA                       | Cat. No. W4011            |
| Horseradish peroxidase (HRP)-conjugated anti-rabbit | Promega, Madison,<br>USA                       | Cat. No. W4021            |
| Immobilon® Western                                  | Millipore, Merck KGaA, Darmstadt,              | Cat. No.<br>WBKLS0500     |

|                                                       |                                          |                                                              |
|-------------------------------------------------------|------------------------------------------|--------------------------------------------------------------|
| Chemiluminescent<br>HRP Substrate                     | Germany                                  |                                                              |
| BSTFA-<br>trimethylchlorosilane                       | Sigma-Aldrich,<br>Steinheim,<br>Germany  | Cat. No. B-023                                               |
| SPLASH®<br>LIPIDOMIX® Mass<br>Spec Standard           | Sigma-Aldrich,<br>Steinheim,<br>Germany, | 330707-1EA                                                   |
| Zorbax Eclipse Plus<br>C18                            | Agilent<br>technologies, USA             | 1.8 µm, 100 mm ×<br>2.1 mm I.D. column                       |
| Various<br>Oligonucleotides                           | See Supplementary<br>Table 11            | N/A                                                          |
| <b>Deposited data</b> <sup>[1]</sup> <sub>SEP</sub>   |                                          |                                                              |
| RNA-seq data                                          | This study                               | GSE174655                                                    |
| <b>Experimental<br/>models:<br/>organisms/strains</b> |                                          |                                                              |
| Agrobacterium<br>tumefaciens GV3301                   | This study                               |                                                              |
| Escherichia coli<br>DH5alpha                          | This study                               |                                                              |
| Arabidopsis thaliana<br>(Columbia-0)                  | This study                               |                                                              |
| <i>smt2-1 (frl1)</i>                                  | 1                                        | EMS mutant (See<br>STAR methods),<br>provided by D.<br>Gleen |
| <i>smt2-2 (cyp1-3)</i>                                | 2                                        | EMS mutant (See<br>STAR methods),<br>provided by D.<br>Gleen |

|                                                      |            |                                                                |
|------------------------------------------------------|------------|----------------------------------------------------------------|
| <i>smt3-1</i>                                        | 3          | SALK_085292,<br>provided by D.<br>Gleen                        |
| <i>pif4-101</i>                                      | 4          | SAIL_114_G06                                                   |
| <i>pif5-3 (pil6-1)</i>                               | 5          | SALK_087012                                                    |
| <i>pif7-1</i>                                        | 6          | CS68809                                                        |
| <i>pif4pif5pif7</i>                                  | 7          | <i>pif4-101, pif5-3,<br/>pif7-1</i>                            |
| <i>pif7-2</i>                                        | 6          | SAIL_622_G02                                                   |
| <i>PIF7-HA line (pif7-2/pPIF7::PIF7-3HA-tPIF7)</i>   | 8          | N/A                                                            |
| <i>PIF4-HA line (pif4-101/pPIF4::PIF4-3HA-tPIF4)</i> | 9          | N/A                                                            |
| <i>cvp2-1</i>                                        | 10         | EMS mutant (See<br>STAR methods),<br>provided by C.<br>Hardtke |
| <i>cvp2-1cvl1-1</i>                                  | 10         | SALK_029945<br>( <i>cvl1</i> ),<br>provided by C.<br>Hardtke   |
| DII-VENUS                                            | 11         | Provided by T.<br>Vernoux                                      |
| DII-VENUS (in<br><i>smt2-1</i> )                     | This study | N/A                                                            |
| <i>atg7-2</i>                                        | 12         | GABI_655B06, prov<br>ided by R. Vierstra                       |
| <i>smt2atg7</i>                                      | This study | <i>smt2-1, atg7-2</i>                                          |
| <i>atg5-2</i>                                        | 13         | SAIL_129B07,<br>provided by Y.                                 |

|                                      |                                      |                                |
|--------------------------------------|--------------------------------------|--------------------------------|
|                                      |                                      | Dagdas                         |
| <i>35S::ATG8a-GFP</i>                | 13                                   | Provided by R. Vierstra        |
| <i>35S::ATG8a-GFP (atg7-2)</i>       | See above                            | Provided by R. Vierstra        |
| <i>35S::GFP</i>                      | This study                           | Provided by L. Allenbach       |
| <i>yuc2-1</i>                        | 14                                   | SALK_030199                    |
| <i>yuc5-1</i>                        | This study                           | SAIL_116_C0                    |
| <i>yuc8-1</i>                        | 14                                   | CS110939                       |
| <i>yuc9-1</i>                        | 14                                   | SAIL_871G01                    |
| <i>yuc2yuc5yuc8yuc9</i>              | This study                           | yuc2-1, yuc5-1, yuc8-1, yuc9-1 |
| <i>UBQ10::mCherry-ATG8e</i>          | 15                                   | Provided by Y. Dagdas          |
| <i>UBQ10::mCherry-ATG8e (atg5-1)</i> | 16                                   | Provided by Y. Dagdas          |
| <b>Recombinant DNA</b>               |                                      |                                |
| <i>pFP100</i>                        | 17                                   | N/A                            |
| <i>pYI001</i>                        | This study                           | Addgene ID: 170833             |
| <i>pYI006</i>                        | This study                           | Addgene ID: 170840             |
| <i>pYI012</i>                        | This study                           | Addgene ID: 170841             |
| <i>pYI046</i>                        | This study                           | Addgene ID: 170842             |
| <i>pYI047</i>                        | This study                           | Addgene ID: 170843             |
| <i>pYI048</i>                        | This study                           | Addgene ID: 170844             |
| <b>Software and algorithms</b>       |                                      |                                |
| bcl2fastq Conversion Software v.2.20 | Illumina; San Diego, California, USA | N/A                            |
| Cutadapt (v. 1.8)                    | 18                                   |                                |
| fastq_screen (v. 0.11.1)             | 19                                   | N/A                            |



|                                                 |                                                                     |                                                                                           |
|-------------------------------------------------|---------------------------------------------------------------------|-------------------------------------------------------------------------------------------|
| eaper (v. 15-065                                | 20                                                                  | N/A                                                                                       |
| STAR (v. 2.5.3a)                                | 21                                                                  | N/A                                                                                       |
| htseq-count (v. 0.9.1)                          | 22                                                                  | N/A                                                                                       |
| RSeQC (v. 2.3.7)                                | 23                                                                  | N/A                                                                                       |
| R version 4.0.2                                 | <a href="http://cran.r-project.org/">http://cran.r-project.org/</a> | N/A                                                                                       |
| R Bioconductor package "edgeR"                  | 24                                                                  | N/A                                                                                       |
| R Bioconductor package "limma"                  | 25                                                                  | N/A                                                                                       |
| ShinyGO v0.61:Gene Ontology Enrichment Analysis | 26                                                                  | <a href="http://bioinformatics.sdstate.edu/go/">http://bioinformatics.sdstate.edu/go/</a> |
| R package "visNetwork"                          | <a href="http://cran.r-project.org/">http://cran.r-project.org/</a> | N/A                                                                                       |
| R package "igraph"                              | <a href="http://cran.r-project.org/">http://cran.r-project.org/</a> | N/A                                                                                       |
| ImageJ                                          | <a href="http://rsb.info.nih.gov/ij">http://rsb.info.nih.gov/ij</a> | N/A                                                                                       |
| MS-Dial software                                | 27                                                                  | N/A                                                                                       |
| LOWESS/Spline normalisation program             | 27                                                                  | N/A                                                                                       |
| R package "agricolae"                           | <a href="http://cran.r-project.org/">http://cran.r-project.org/</a> |                                                                                           |
| ZEN 2012 v. 8,0,7273 (black edition-64 bit)     | LSM 710                                                             | N/A                                                                                       |
| ImageQuant LAS 4000                             | GE Healthcare, Buckinghamshire,                                     | N/A                                                                                       |

## References

- 1 Hase, Y. *et al.* Ectopic endoreduplication caused by sterol alteration results in serrated petals in Arabidopsis. *J Exp Bot* **56**, 1263-1268, doi:10.1093/jxb/eri122 (2005).
- 2 Carland, F. M. The Identification of CVP1 Reveals a Role for Sterols in Vascular Patterning. *The Plant Cell Online* **14**, 2045-2058, doi:10.1105/tpc.003939 (2002).
- 3 Carland, F., Fujioka, S. & Nelson, T. The sterol methyltransferases SMT1, SMT2, and SMT3 influence Arabidopsis development through nonbrassinosteroid products. *Plant Physiol* **153**, 741-756, doi:10.1104/pp.109.152587 (2010).
- 4 Lorrain, S., Allen, T., Duek, P. D., Whitelam, G. C. & Fankhauser, C. Phytochrome-mediated inhibition of shade avoidance involves degradation of growth-promoting bHLH transcription factors. *Plant J* **53**, 312-323, doi:10.1111/j.1365-313X.2007.03341.x (2008).
- 5 Fujimori, T., Yamashino, T., Kato, T. & Mizuno, T. Circadian-controlled basic/helix-loop-helix factor, PIL6, implicated in light-signal transduction in Arabidopsis thaliana. *Plant Cell Physiol* **45**, 1078-1086, doi:10.1093/pcp/pch124 (2004).
- 6 Leivar, P. *et al.* The Arabidopsis phytochrome-interacting factor PIF7, together with PIF3 and PIF4, regulates responses to prolonged red light by modulating phyB levels. *Plant Cell* **20**, 337-352, doi:10.1105/tpc.107.052142 (2008).
- 7 de Wit, M., Ljung, K. & Fankhauser, C. Contrasting growth responses in lamina and petiole during neighbor detection depend on differential auxin responsiveness rather than different auxin levels. *New Phytol* **208**, 198-209, doi:10.1111/nph.13449 (2015).
- 8 Galvao, V. C. *et al.* PIF transcription factors link a neighbor threat cue to accelerated reproduction in Arabidopsis. *Nat Commun* **10**, 4005, doi:10.1038/s41467-019-11882-7 (2019).
- 9 Zhang, B. *et al.* BLADE-ON-PETIOLE proteins act in an E3 ubiquitin ligase complex to regulate PHYTOCHROME INTERACTING FACTOR 4 abundance. *Elife* **6**, doi:10.7554/eLife.26759 (2017).
- 10 Carland, F. & Nelson, T. CVP2- and CVL1-mediated phosphoinositide signaling as a regulator of the ARF GAP SFC/VAN3 in establishment of foliar vein patterns. *Plant J* **59**, 895-907, doi:10.1111/j.1365-313X.2009.03920.x (2009).
- 11 Brunoud, G. *et al.* A novel sensor to map auxin response and distribution at high spatio-temporal resolution. *Nature* **482**, 103-106, doi:10.1038/nature10791 (2012).

- 12 Hofius, D. *et al.* Autophagic components contribute to hypersensitive cell death in Arabidopsis. *Cell* **137**, 773-783, doi:10.1016/j.cell.2009.02.036 (2009).
- 13 Thompson, A. R., Doelling, J. H., Suttangkakul, A. & Vierstra, R. D. Autophagic Nutrient Recycling in Arabidopsis Directed by the ATG8 and ATG12 Conjugation Pathways. *Plant Physiology* **138**, 2097-2110, doi:10.1104/pp.105.060673 (2005).
- 14 Nozue, K. *et al.* Shade avoidance components and pathways in adult plants revealed by phenotypic profiling. *PLoS Genet* **11**, e1004953, doi:10.1371/journal.pgen.1004953 (2015).
- 15 Hu, S., Ye, H., Cui, Y. & Jiang, L. AtSec62 is critical for plant development and is involved in ER-phagy in Arabidopsis thaliana. *J Integr Plant Biol* **62**, 181-200, doi:10.1111/jipb.12872 (2020).
- 16 Stephani, M. *et al.* A cross-kingdom conserved ER-phagy receptor maintains endoplasmic reticulum homeostasis during stress. *Elife* **9**, doi:10.7554/eLife.58396 (2020).
- 17 Bensmihen, S. *et al.* Analysis of an activated ABI5 allele using a new selection method for transgenic Arabidopsis seeds. *FEBS Letters* **561**, 127-131, doi:10.1016/s0014-5793(04)00148-6 (2004).
- 18 Martin, M. Cutadapt removes adapter sequences from high-throughput sequencing reads. *EMBnet.journal* **17**, doi:10.14806/ej.17.1.200 (2011).
- 19 Wingett, S. W. & Andrews, S. FastQ Screen: A tool for multi-genome mapping and quality control. *F1000Res* **7**, 1338, doi:10.12688/f1000research.15931.2 (2018).
- 20 Davis, M. P., van Dongen, S., Abreu-Goodger, C., Bartonicek, N. & Enright, A. J. Kraken: a set of tools for quality control and analysis of high-throughput sequence data. *Methods* **63**, 41-49, doi:10.1016/j.ymeth.2013.06.027 (2013).
- 21 Dobin, A. *et al.* STAR: ultrafast universal RNA-seq aligner. *Bioinformatics* **29**, 15-21, doi:10.1093/bioinformatics/bts635 (2013).
- 22 Anders, S., Pyl, P. T. & Huber, W. HTSeq--a Python framework to work with high-throughput sequencing data. *Bioinformatics* **31**, 166-169, doi:10.1093/bioinformatics/btu638 (2015).
- 23 Wang, L., Wang, S. & Li, W. RSeQC: quality control of RNA-seq experiments. *Bioinformatics* **28**, 2184-2185, doi:10.1093/bioinformatics/bts635 (2012).
- 24 Robinson, M. D., McCarthy, D. J. & Smyth, G. K. edgeR: a Bioconductor package for differential expression analysis of digital gene expression data. *Bioinformatics* **26**, 139-140, doi:10.1093/bioinformatics/btp616 (2010).
- 25 Ritchie, M. E. *et al.* limma powers differential expression analyses for RNA-sequencing and microarray studies. *Nucleic Acids Res* **43**, e47, doi:10.1093/nar/gkv007 (2015).
- 26 Ge, S. X., Jung, D. & Yao, R. ShinyGO: a graphical gene-set enrichment tool for animals and plants. *Bioinformatics* **36**, 2628-2629, doi:10.1093/bioinformatics/btz931 (2020).

- 27 Tsugawa, H. *et al.* MS-DIAL: data-independent MS/MS deconvolution for comprehensive metabolome analysis. *Nat Methods* **12**, 523-526, doi:10.1038/nmeth.3393 (2015).
